# Supplementary material
Source: HighWire-hosted journal article supplement (https://bmjopen.bmj.com/content/11/9/e048851)
Supplement: inline-supplementary-material-1 [file inline-supplementary-material-1.pdf]

**Supplementary file 1** (only contents related to this study)Questionnaire on online medical services uptake of physicians in Jiangsu  
Province

| Part I |                                                                                                                                                                                             |
|--------|---------------------------------------------------------------------------------------------------------------------------------------------------------------------------------------------|
| 1      | <b>Gender:</b><br>① Male ② Female                                                                                                                                                           |
| 2      | <b>Birth date:</b> _____                                                                                                                                                                    |
| 3      | <b>Education:</b><br>① Junior college or below ② Undergraduate ③ Postgraduate ④ Doctorate ⑤ Post-doctorate                                                                                  |
| 4      | <b>Hospital level:</b><br>① Community hospital ② Comprehensive hospital                                                                                                                     |
| 5      | <b>Working years:</b><br>① <3 years ② 3-5 years ③ 5-10 years ④ 10-15 years ⑤ >15 years                                                                                                      |
| 6      | <b>Job title:</b><br>① Resident physician ② Attending physician ③ Deputy chief physician ④ Chief physician                                                                                  |
| 7      | <b>Departments:</b><br>① Surgery ② Internal medicine (3) Others                                                                                                                             |
| 8      | <b>Do you hold an administrative position?</b><br>① Yes ② No                                                                                                                                |
| 9      | <b>Physicians can conduct online medical services in multiple online medical platforms at the same time</b><br>① Yes ② No ③ I don't know                                                    |
| 10     | <b>Physicians can provide patients with disease consultation, chronic disease management, telemedicine and other services through online medical platforms</b><br>① Yes ② No ③ I don't know |
| 11     | <b>Before the COVID-19 pandemic, government bans physicians from conduct first diagnosis to patients online</b><br>① Yes ② No ③ I don't know                                                |
| 12     | <b>Online medical platform requires registration, real-name certification, uploading practicing qualification certificates, etc.</b><br>① Yes ② No ③ I don't know                           |
| 13     | <b>Conducting online health services should have more than 3 years of independent work experience</b><br>① Yes ② No ③ I don't know                                                          |
| 14     | <b>Can you operate the online medical platform proficiently?</b><br>① Yes ② No                                                                                                              |

|                                                   |                                                                                                                                                                                   |
|---------------------------------------------------|-----------------------------------------------------------------------------------------------------------------------------------------------------------------------------------|
| 15                                                | <b>Can you distinguish whether the online medical platform is legal and reliable?</b><br>① Yes ② No                                                                               |
| 16                                                | <b>Can you coordinate online and offline medical working hours?</b><br>① Yes ② No                                                                                                 |
| 17                                                | <b>Can you independently provide online medical services to patients?</b><br>① Yes ② No                                                                                           |
| 18                                                | <b>Can you solve the difficulty in conducting online medical services?</b><br>① Yes ② No                                                                                          |
| 20                                                | <b>Does the hospital carry out online medical services?</b><br>① Yes ② No                                                                                                         |
| 21                                                | <b>Has the hospital ever conducted online medical service training activities?</b><br>① Yes ② No                                                                                  |
| 22                                                | <b>Have you learned about colleagues' experiences with online health services?</b><br>① Yes ② No                                                                                  |
| 23                                                | <b>Have the colleagues or leaders recommended online health services to you?</b><br>① Yes ② No                                                                                    |
| 24                                                | <b>Have offline patients asked about your experience in providing online medical services?</b><br>① Yes ② No                                                                      |
| 25                                                | <b>Does the hospital have perfect equipment and technical support to carry out online medical services?</b><br>① Yes ② No                                                         |
| 26                                                | <b>Does the hospital have an incentive mechanism to prompt physicians to use online health services?</b><br>① Yes ② No                                                            |
| 27                                                | <b>Can media orientation affect you conducting online medical services?</b><br>① Yes ② No                                                                                         |
| 28                                                | <b>Whether the laws and policies can well solve the medical disputes occurred in the online medical process will affect you conducting online medical services?</b><br>① Yes ② No |
| 29                                                | <b>Whether the legitimacy of the online medical platform will affect you conducting online medical services?</b><br>① Yes ② No                                                    |
| 30                                                | <b>Whether the humanistic care for physicians of the online medical platform will affect you conducting online medical services?</b><br>① Yes ② No                                |
| 31                                                | <b>Whether the proportion of withdrawing diagnostic fees of the online medical platform will affect you conducting online medical services?</b><br>① Yes ② No                     |
| <b>Part II</b>                                    |                                                                                                                                                                                   |
| 32                                                | <b>Have you used online medical services to provide services to patients before?</b><br>① Yes ② No                                                                                |
| <b>Online medical services uptake willingness</b> |                                                                                                                                                                                   |
| 33.1                                              | <b>I will provide online medical services to patients when needed</b><br>① Absolutely disagree ② Disagree ③ A little agree ④ Mostly agree ⑤ Absolutely agree                      |

|      |                                                                                                                                                                                                |
|------|------------------------------------------------------------------------------------------------------------------------------------------------------------------------------------------------|
| 33.2 | <b>I would recommend others (e.g., peers, patients) to use online health services when needed</b><br>① Absolutely disagree ② Disagree ③ A little agree ④ Mostly agree ⑤ Absolutely agree       |
| 33.3 | <b>I have a high probability of using online medical services in the future</b><br>① Absolutely disagree ② Disagree ③ A little agree ④ Mostly agree ⑤ Absolutely agree                         |
| 33.4 | <b>I will use online medical services more frequently if the patient uses the online health service</b><br>① Absolutely disagree ② Disagree ③ A little agree ④ Mostly agree ⑤ Absolutely agree |
| 33.5 | <b>I think online health services are an indispensable part of my work</b><br>① Absolutely disagree ② Disagree ③ A little agree ④ Mostly agree ⑤ Absolutely agree                              |
